# Supplementary material for: Conotoxin Prediction: New Features to Increase Prediction Accuracy
Source: MDPI journal article supplement (doi:10.3390/toxins15110641), 2023-11-03
Supplement: s1 [file s1]

# Supplementary Materials: Conotoxin Prediction: New Features to Increase Prediction Accuracy

Lyman K. Monroe, Duc P. Truong, Jacob C. Miner, Samantha H. Adikari, Zachary J. Sasiene, Paul W. Fenimore, Boian Alexandrov, Robert F. Williams, and Hau B. Nguyen

**Table S1.** HPCCS parameters for common post-translational modifications found in conotoxins.

| Post-Translational Modification | HPCCS parameters |      |        |          |
|---------------------------------|------------------|------|--------|----------|
| Hydroxyproline                  | PCA              | N    | -0.465 | 1.550 N  |
|                                 | PCA              | CA   | -0.065 | 1.700 CT |
|                                 | PCA              | CB   | -0.324 | 1.700 CT |
|                                 | PCA              | CG   | -0.454 | 1.700 CT |
|                                 | PCA              | CD   | 0.827  | 1.700 C  |
|                                 | PCA              | OE   | -0.766 | 1.520 O  |
|                                 | PCA              | C    | 0.518  | 1.700 C  |
|                                 | PCA              | O    | -0.716 | 1.520 O  |
|                                 | PCA              | HA   | 0.263  | 1.200 H1 |
|                                 | PCA              | HB2  | 0.302  | 1.200 HC |
|                                 | PCA              | HB3  | 0.265  | 1.200 HC |
|                                 | PCA              | HG2  | 0.314  | 1.200 HC |
|                                 | PCA              | HG3  | 0.301  | 1.200 HC |
| Pyroglutamic acid               | HYP              | N    | -0.404 | 1.550 N  |
|                                 | HYP              | CA   | -0.061 | 1.700 CT |
|                                 | HYP              | C    | 0.472  | 1.700 C  |
|                                 | HYP              | O    | -0.741 | 1.520 O  |
|                                 | HYP              | CB   | -0.352 | 1.700 CT |
|                                 | HYP              | CG   | 0.142  | 1.700 CT |
|                                 | HYP              | CD   | -0.226 | 1.700 CT |
|                                 | HYP              | OD1  | -0.917 | 1.520 OH |
|                                 | HYP              | HA   | 0.250  | 1.200 H1 |
|                                 | HYP              | HB2  | 0.286  | 1.200 HC |
|                                 | HYP              | HB3  | 0.293  | 1.200 HC |
|                                 | HYP              | HG   | 0.226  | 1.200 H1 |
|                                 | HYP              | HD22 | 0.283  | 1.200 H1 |
|                                 | HYP              | HD23 | 0.267  | 1.200 H1 |
|                                 | HYP              | HD1  | 0.482  | 1.200 HO |
| Carboxyglutamic acid            | CGU              | N    | -0.297 | 1.550 N  |
|                                 | CGU              | CA   | -0.013 | 1.700 CT |
|                                 | CGU              | C    | 0.649  | 1.700 CT |
|                                 | CGU              | O    | -0.652 | 1.520 O  |
|                                 | CGU              | CB   | -0.261 | 1.700 CT |
|                                 | CGU              | CG   | -0.413 | 1.700 CT |
|                                 | CGU              | CD1  | 1.174  | 1.700 C  |
|                                 | CGU              | CD2  | 1.171  | 1.700 C  |
|                                 | CGU              | OE11 | -0.673 | 1.520 O2 |
|                                 | CGU              | OE12 | -0.780 | 1.520 O2 |

|      |     |      |        |       |    |
|------|-----|------|--------|-------|----|
|      | CGU | OE21 | -0.695 | 1.520 | O2 |
|      | CGU | OE22 | -0.764 | 1.520 | O2 |
|      | CGU | HA   | 0.376  | 1.200 | H1 |
|      | CGU | HB2  | 0.411  | 1.200 | HC |
|      | CGU | HB3  | 0.369  | 1.200 | HC |
|      | CGU | HG   | 0.398  | 1.200 | HC |
| -NH2 | NH2 | N    | -0.463 | 1.824 | N  |
|      | NH2 | HN1  | 0.231  | 0.600 | H  |
|      | NH2 | HN2  | 0.231  | 0.600 | H  |

### Physiochemical definitions

**Table S2.** List of physiochemical classes (left) and amino acids within each class (right). .  
h = Hydroxyproline, p = Pyroglutamic acid, c = Carboxyglutamic acid

| Physiochemical Class | Amino Acids |
|----------------------|-------------|
| Charged              | DKEHR       |
| Aliphatic            | ILV         |
| Aromatic             | FHWY        |
| Polar                | DERKQN      |
| Hydrophobic          | CVLIMFW     |
| Positively Charged   | KRH         |
| Negatively Charged   | DE          |
| Tiny                 | GACDST      |
| Small                | EHILKMNPQV  |
| Large                | FRWY        |
| PRM                  | hpc         |
|                      |             |

### Secondary Structure

**Table S3.** DSSP secondary structure definitions.

| DSSP name | Definition                                                                                               |
|-----------|----------------------------------------------------------------------------------------------------------|
| G         | 3-turn helix (310 helix). Min length 3 residues.                                                         |
| H         | 4-turn helix (alpha helix). Min length 4 residues.                                                       |
| I         | 5-turn helix (pi helix). Min length 5 residues.                                                          |
| T         | hydrogen bonded turn (3, 4 or 5 turn)                                                                    |
| E         | beta sheet in parallel and/or anti-parallel sheet conformation (extended strand). Min length 2 residues. |
| B         | residue in isolated beta-bridge (single pair beta-sheet hydrogen bond formation)                         |
| S         | bend (the only non-hydrogen-bond based assignment)                                                       |

DSSP was also used to determine the solvent accessible surface area (SASA) of each residue. The SASA of each residue was added to the total for each respective residue class as defined in table S1.

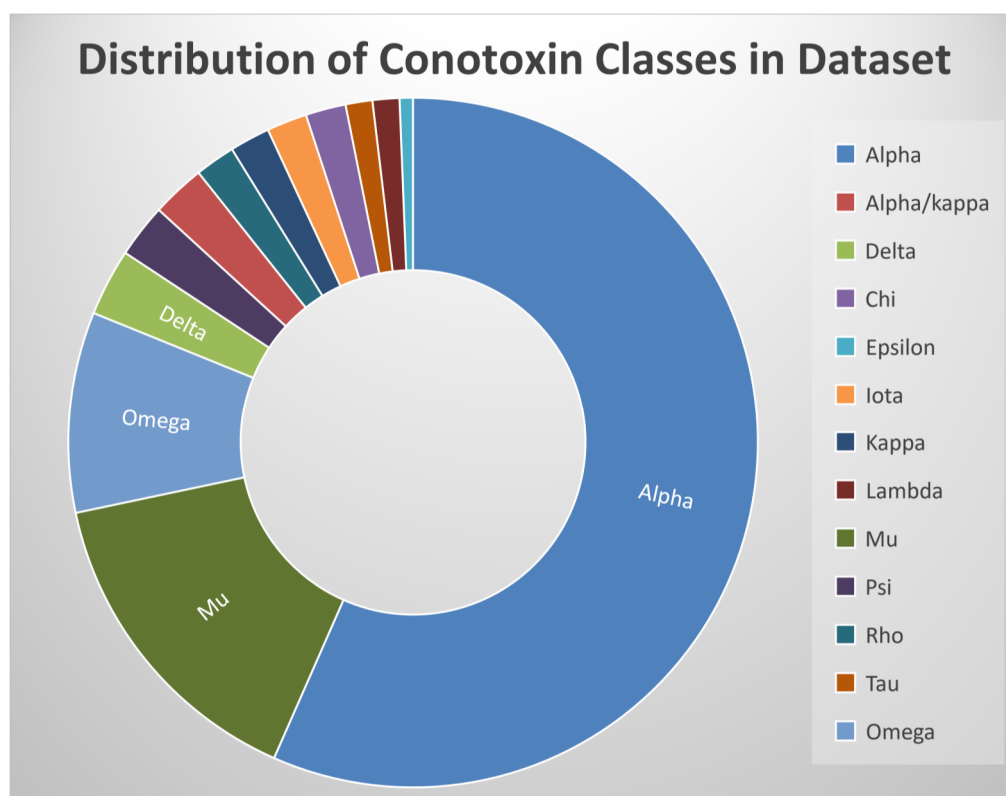

**Figure S1.** Distribution of conotoxin classes  
Fraction of each conotoxin class in the positive dataset.

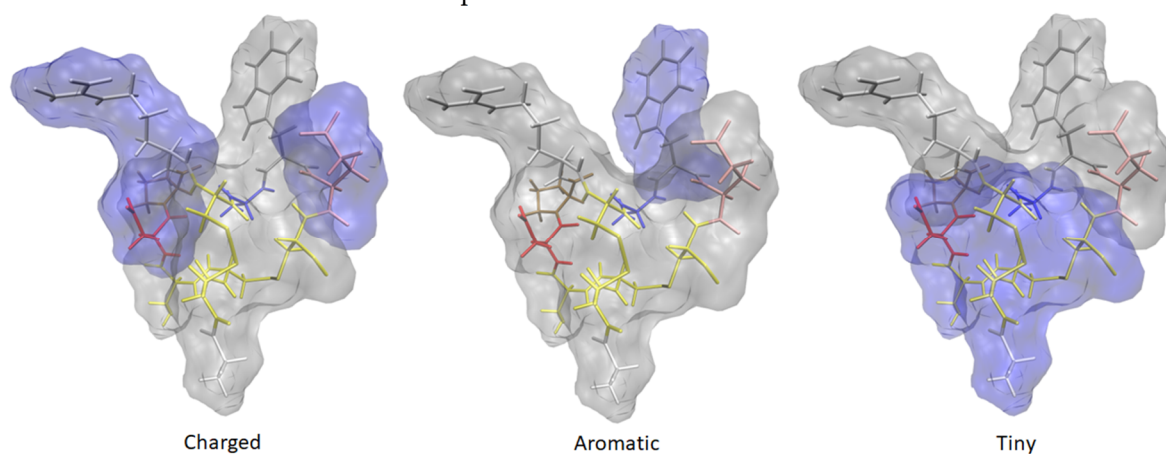

**Figure S2.** Solvent exposure

The conotoxin IM1 with a native disulfide binding pattern shown in a liquorish and transparent surface representation. The surface is colored in blue for charge, aromatic, and tiny residues in the left, middle and right panels respectively. Other types of surfaces are shown in silver in each panel.

**Table S4.** Feature sets.

| Feature Set | Included features                                                                                                                                                                                                                                                                                                                                                                                                                                                           |
|-------------|-----------------------------------------------------------------------------------------------------------------------------------------------------------------------------------------------------------------------------------------------------------------------------------------------------------------------------------------------------------------------------------------------------------------------------------------------------------------------------|
| P           | Number of Charged residues.<br>Number of Aliphatic residues.<br>Number of Aromatic residues.<br>Number of Polar residues.<br>Number of Hydrophobic residues.<br>Number of Positively charged residues.<br>Number of Negatively charged residues.<br>Number of Tiny residues.<br>Number of Small residues.<br>Number of Large residues.<br>Total Charge<br>MASS(KDA)<br>Normalized amino acid counts (number of an Amino acid / sequence length)<br>Dipeptide0<br>Dipeptide1 |
| P2          | Dipeptide2<br>Number of posttranslational modifications                                                                                                                                                                                                                                                                                                                                                                                                                     |
| SS          | Number of residues in the DSSP defined structures: G, H, I, T, E, B, S.<br><br>SASA of:<br><br>-Charged residues.<br>-Aliphatic residues.<br>-Aromatic residues.<br>-Polar residues.<br>-Hydrophobic residues.<br>-Positively charged residues.<br>-Negatively charged residues.<br>-Tiny residues.<br>-Small residues.<br>-Large residues.<br><br>- Posttranslational Modifications<br><br>Total SASA.<br><br>Radius of Gyration.<br><br>Number of disulfide bonds.        |
| CCS         | Calculated Collisional Cross Section.                                                                                                                                                                                                                                                                                                                                                                                                                                       |

Libraries used in this work:

Perl libraries used for feature extraction: Math

Python libraries used: sys, os, glob, numpy, itertools, pandas, collections, statistics, pickle, csv.
